# Supplementary material
Source: PubMed Central journal article supplement (PMC8248227)

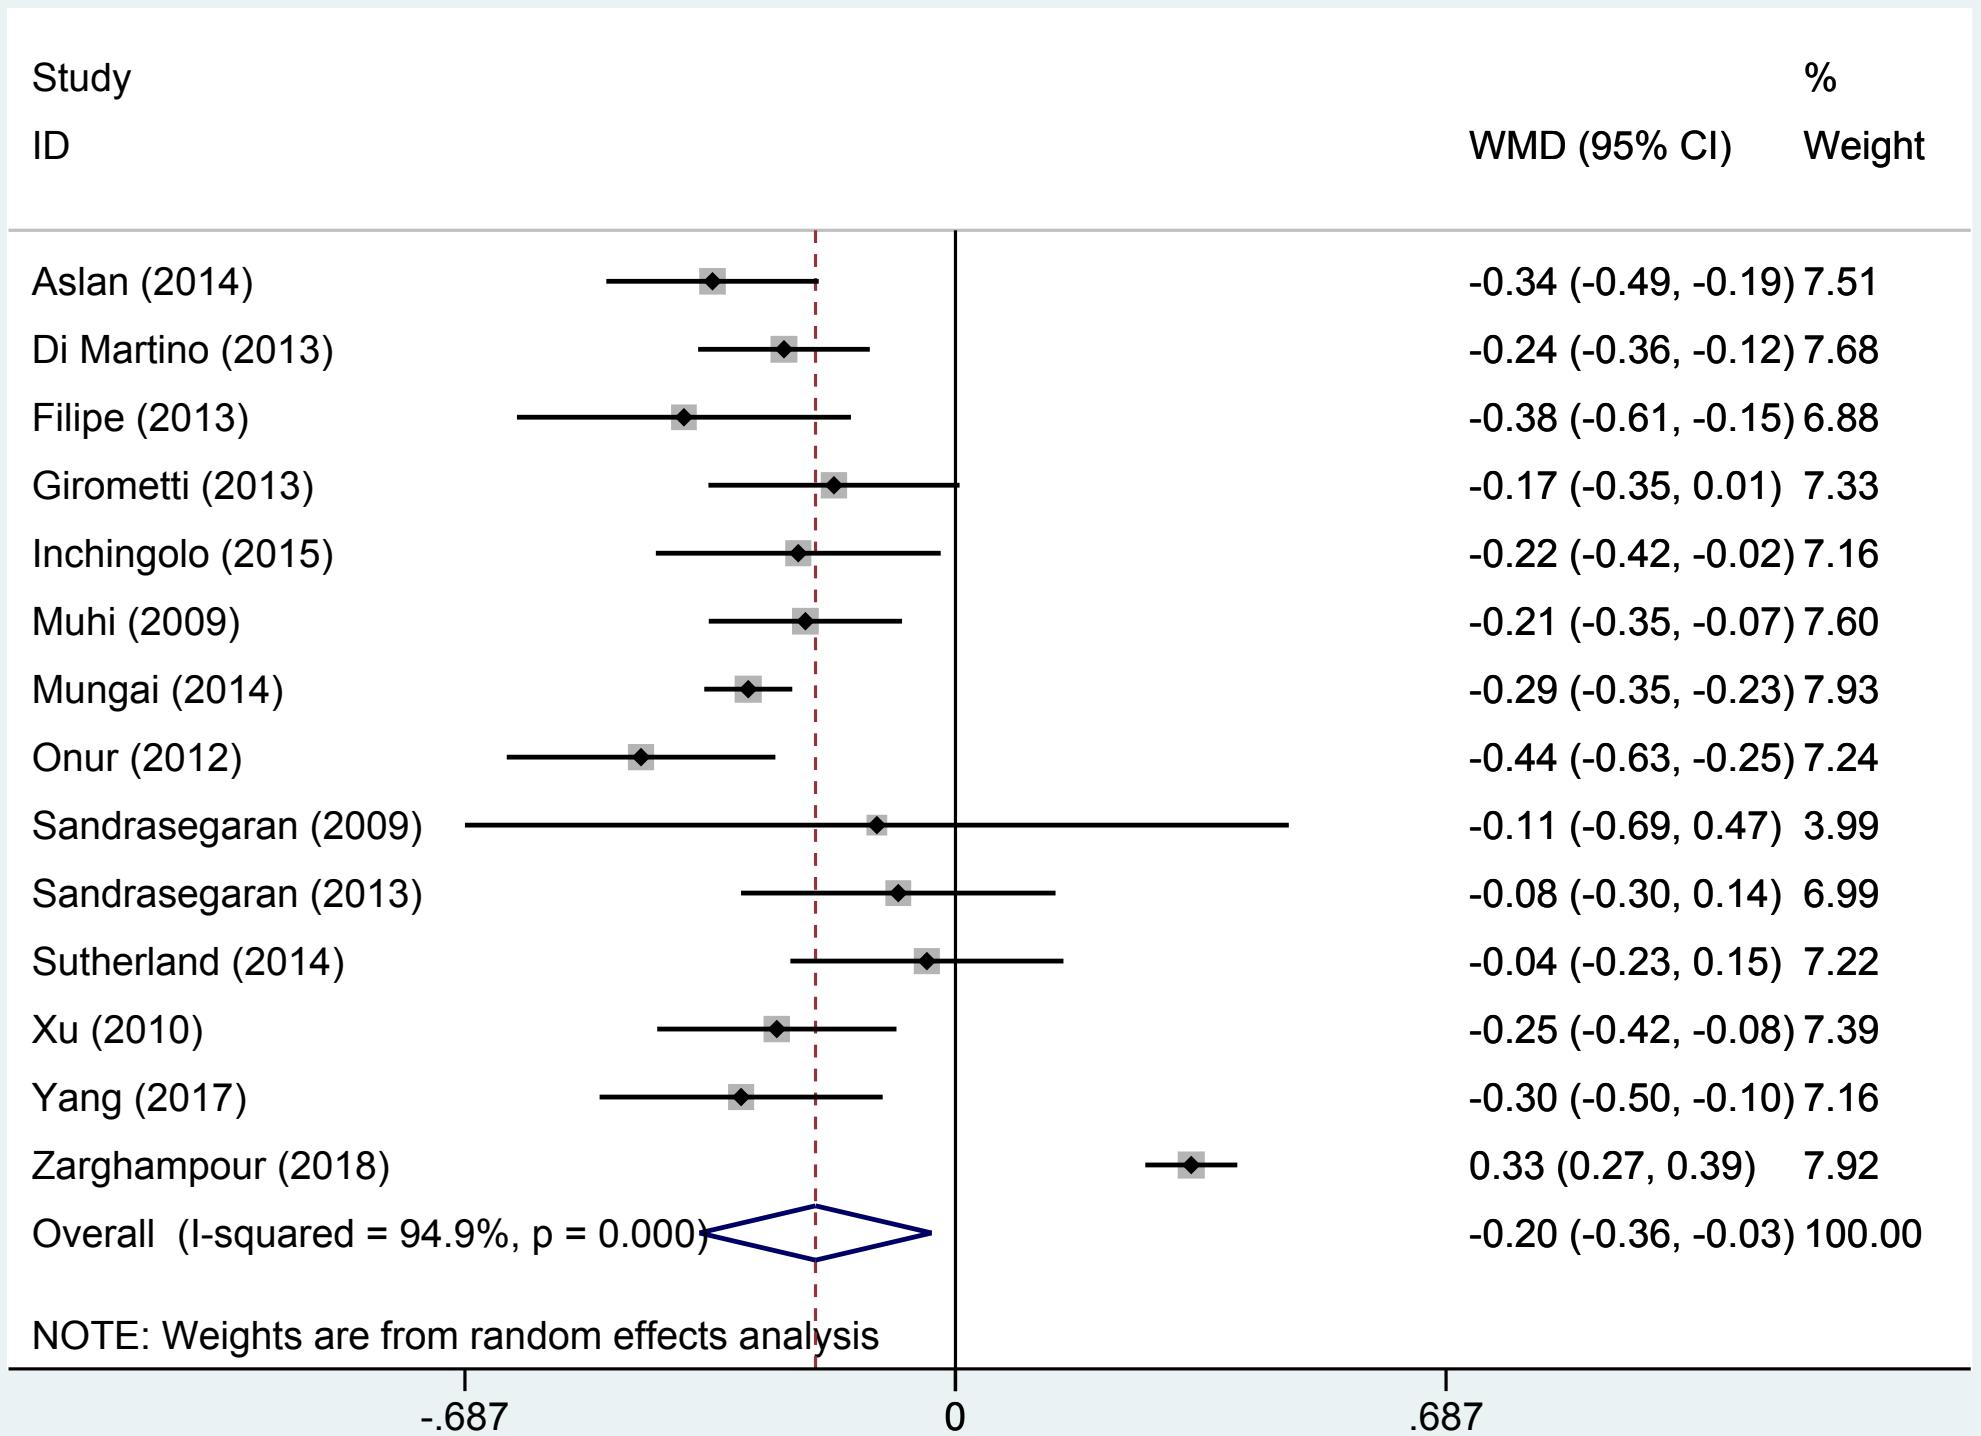

Supplement: bjr.20210059.suppl-01.pdf [file bjr.20210059.suppl-01.pdf]

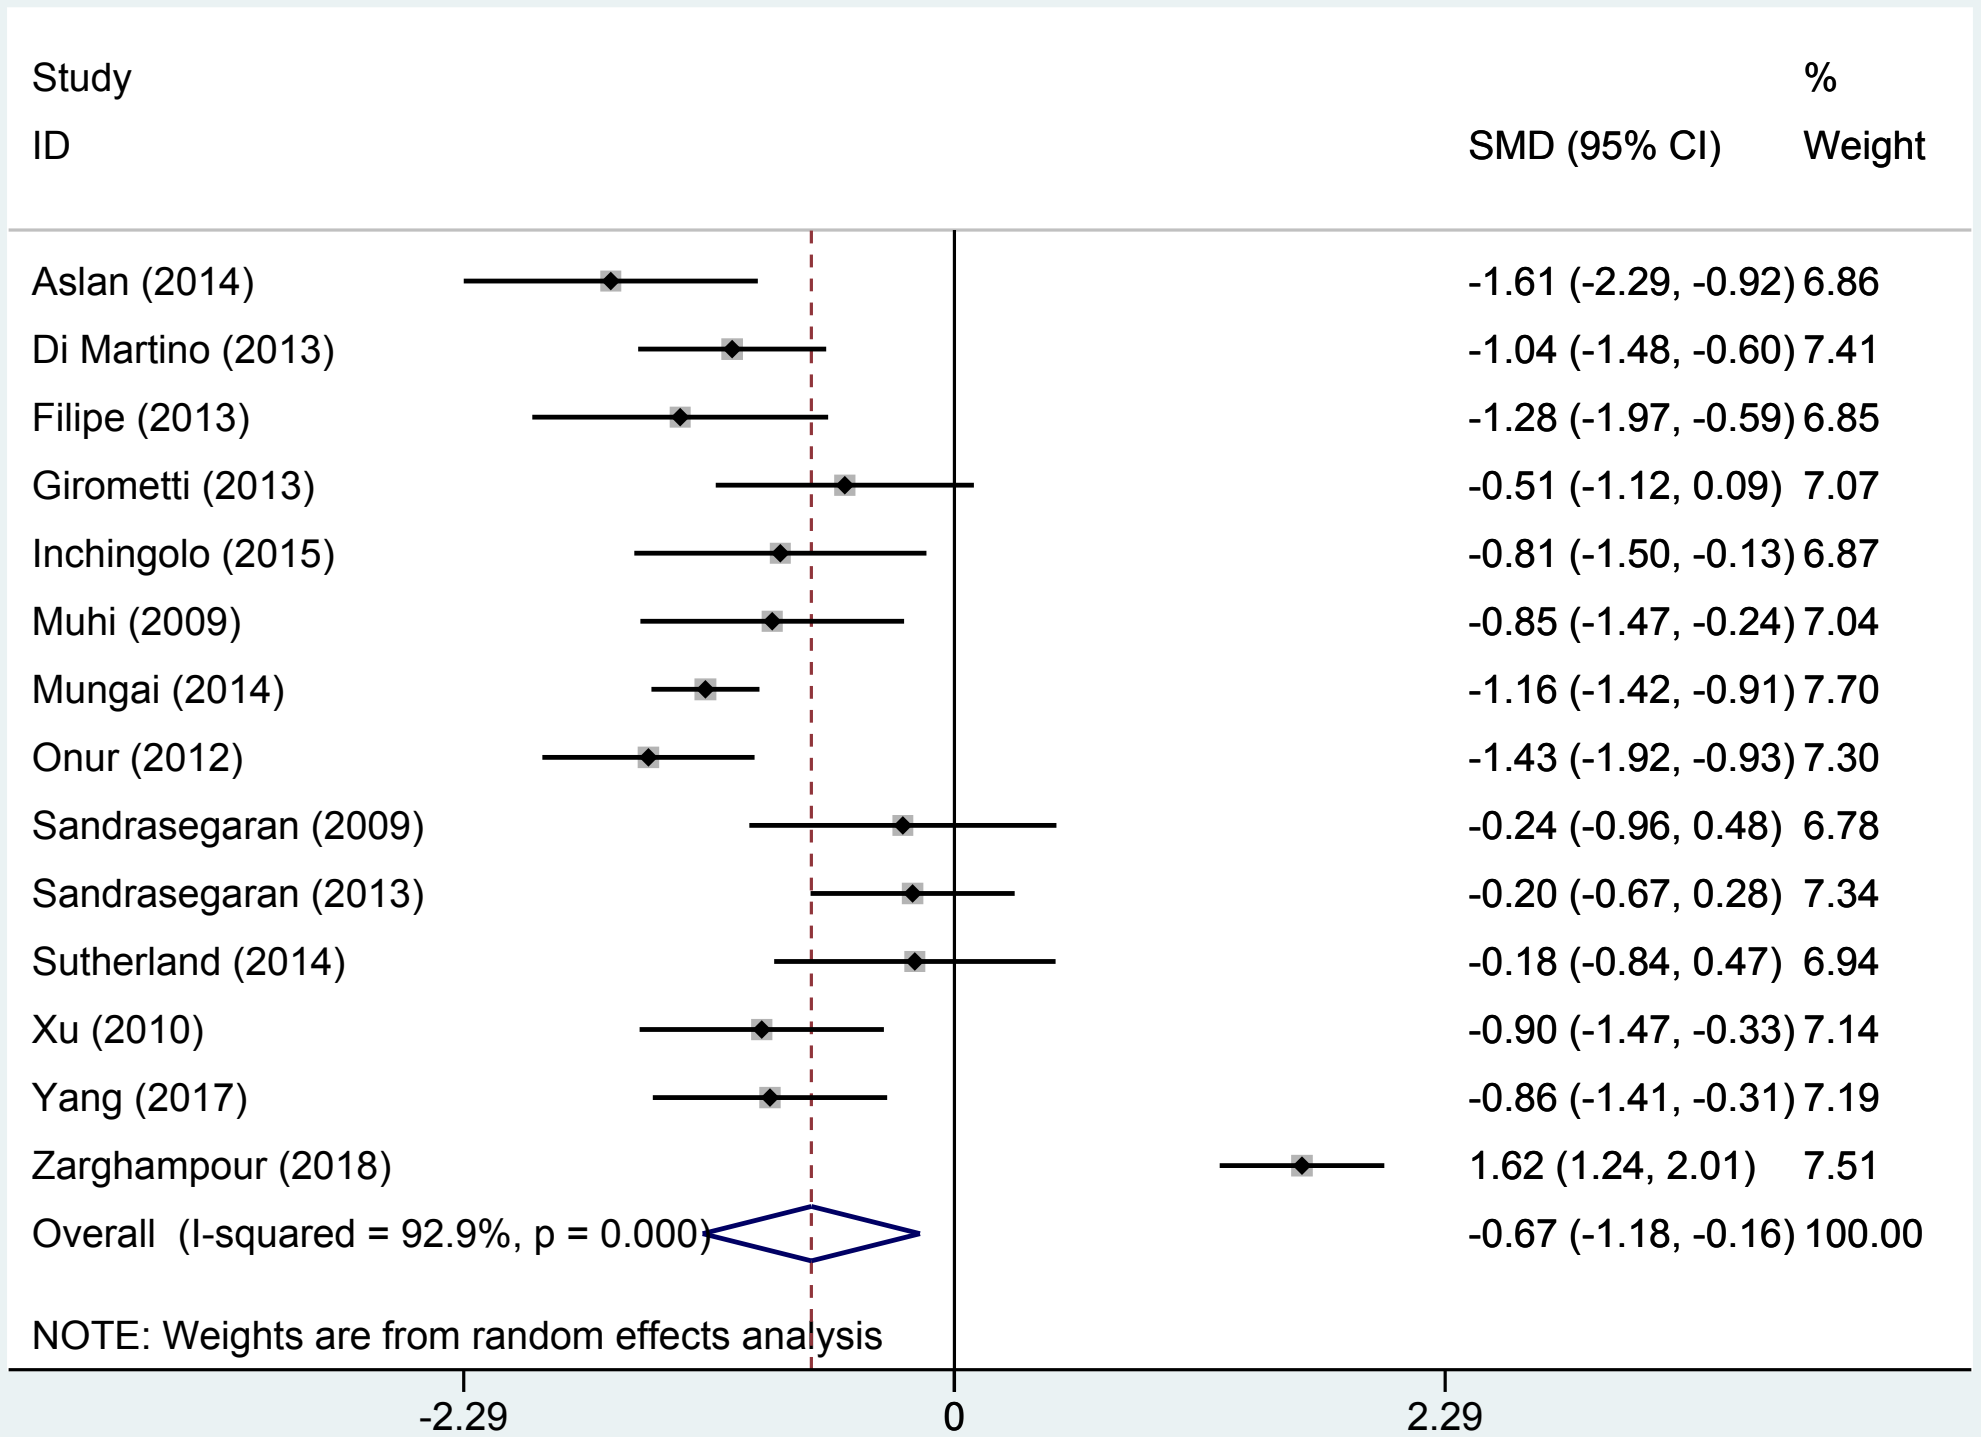

Supplement: bjr.20210059.suppl-02.pdf [file bjr.20210059.suppl-02.pdf]

Bivariate Boxplot

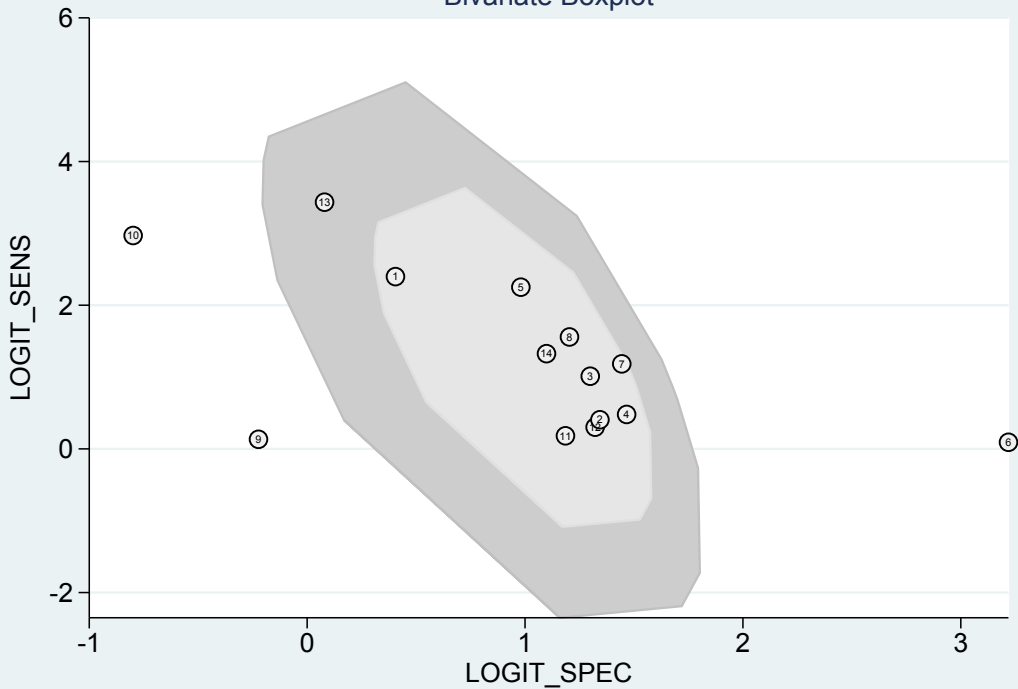

Supplement: bjr.20210059.suppl-03.pdf [file bjr.20210059.suppl-03.pdf]

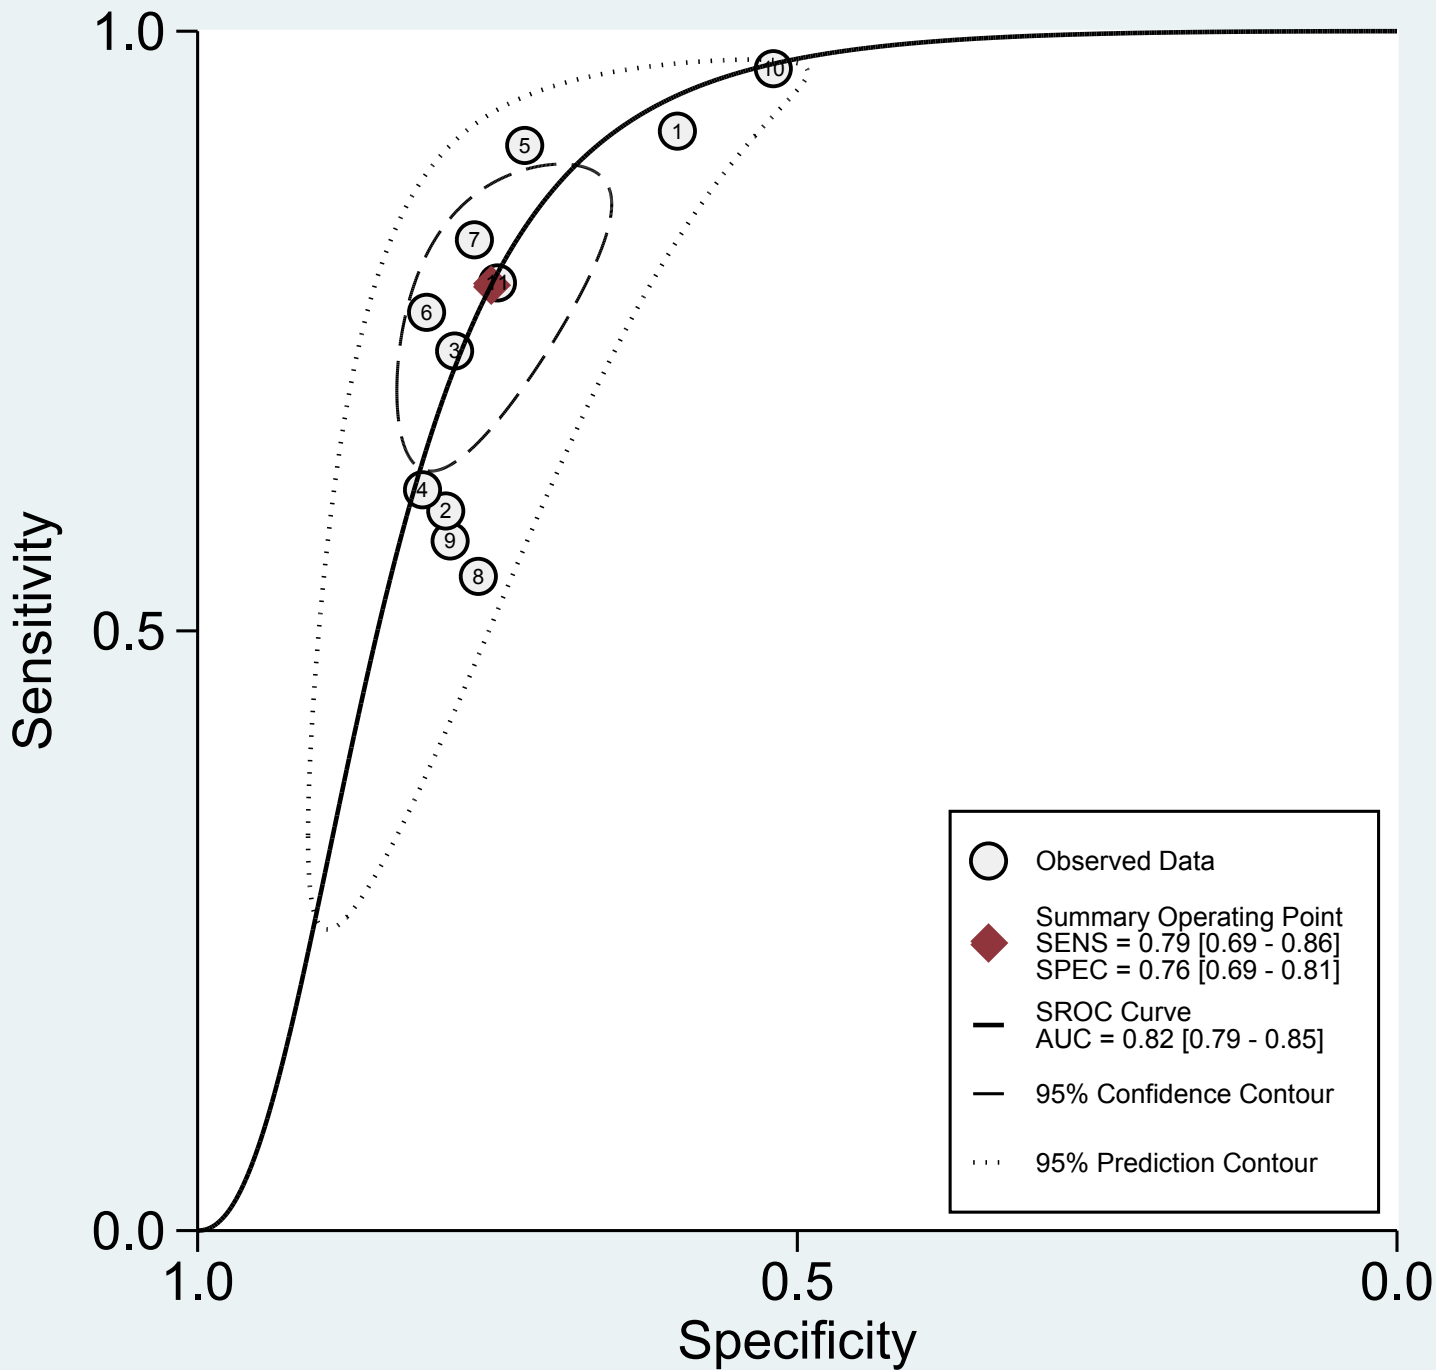

Supplement: bjr.20210059.suppl-04.pdf [file bjr.20210059.suppl-04.pdf]

# Univariable Meta-regression & Subgroup Analyses

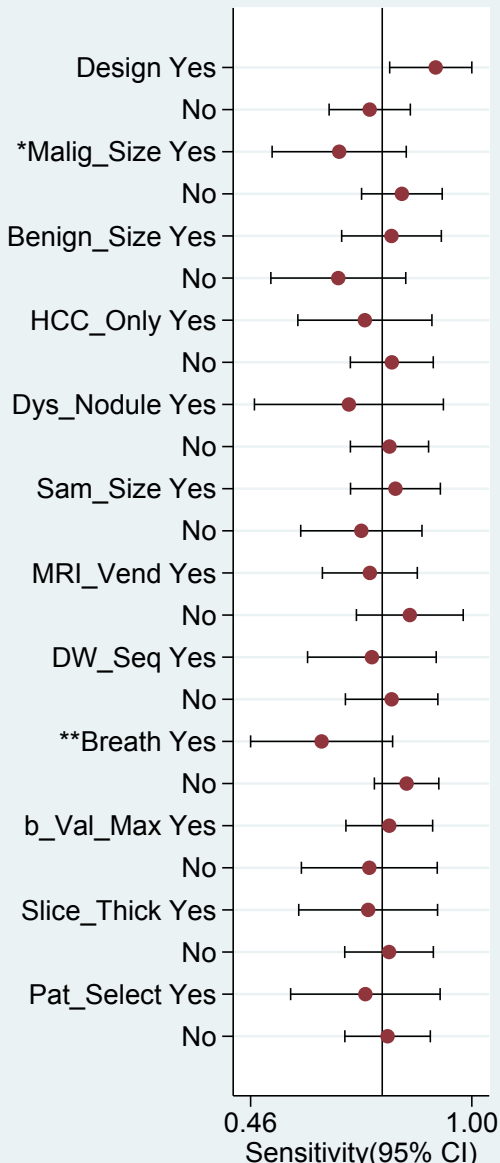

\*p<0.05, \*\*p<0.01, \*\*\*p<0.001

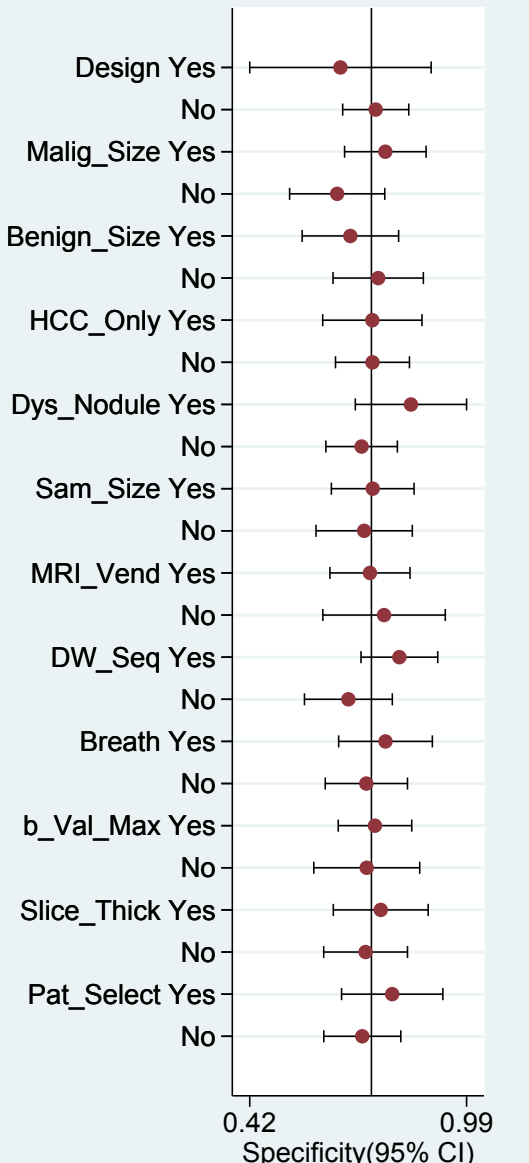

\*p<0.05, \*\*p<0.01, \*\*\*p<0.001

Supplement: bjr.20210059.suppl-05.pdf [file bjr.20210059.suppl-05.pdf]
